# Supplementary material
Source: MDPI journal article supplement (https://www.mdpi.com/2073-4344/7/1/30)
Supplement: s1 [file s1]

## Supplementary Materials: Synergically Improving Light Harvesting and Charge Transportation of TiO<sub>2</sub> Nanobelts by Deposition of MoS<sub>2</sub> for Enhanced Photocatalytic Removal of Cr(VI)

Jie Liu, Ying Li, Jun Ke, Zhong Wang and Huining Xiao

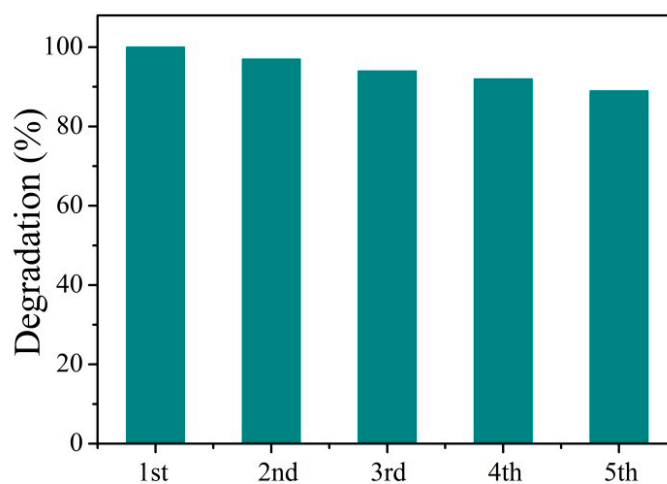

**Figure S1.** The recycling runs for photoreduction of Cr(VI) in the presence of the MoS<sub>2</sub>/TiO<sub>2</sub> nanotubes (NTs) sample.
